# Supplementary material
Source: PubMed Central journal article supplement (PMC5472506)
Supplement: NIHMS839990-supplement.pdf [file NIHMS839990-supplement.pdf]

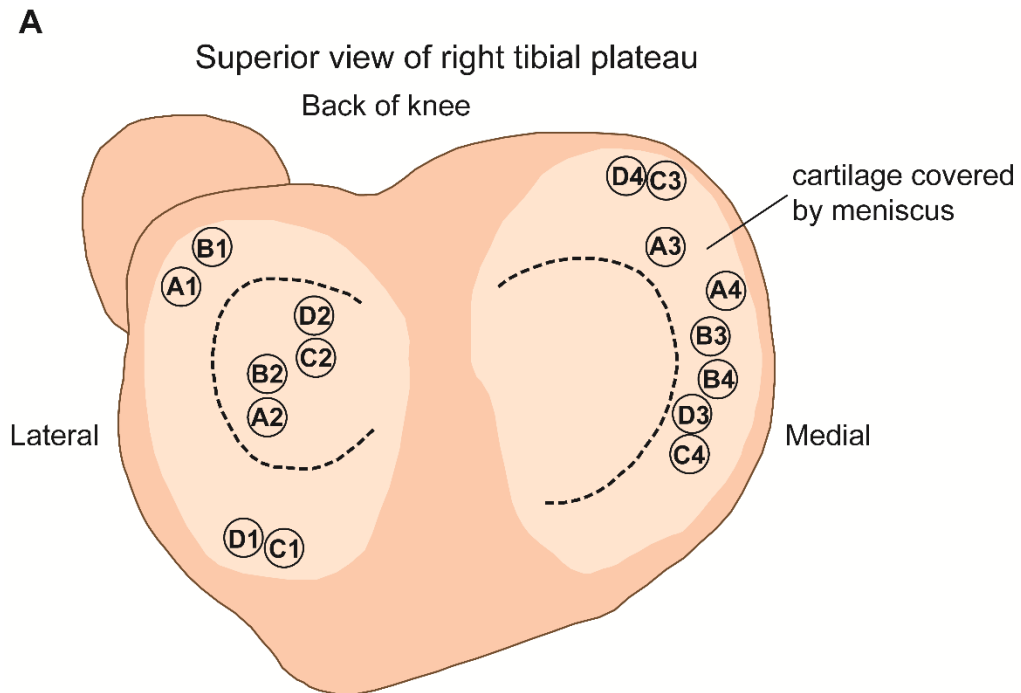

**B**

| Plug # | <i>Thickness (mm)</i> |         |         |             |
|--------|-----------------------|---------|---------|-------------|
|        | Control (A)           | Inj (B) | Cyt (C) | Cyt+inj (D) |
| 1      | 1.4151                | 1.4828  | 1.4405  | 1.4649      |
| 2      | 1.4985                | 1.4585  | 1.4594  | 1.5038      |
| 3      | 1.3695                | 1.3141  | 1.3971  | 1.3320      |
| 4      | 1.1057                | 1.0187  | 1.1878  | 1.1235      |

**Supplementary Figure 1. A.** Figure depicting the locations on the tibial plateau where individual explants were taken. **B.** Thickness of the explants used for this manuscript.
